# Supplementary material for: Omnidirectional Triboelectric Nanogenerator for Wide-Speed-Range Wind Energy Harvesting
Source: MDPI journal article supplement (doi:10.3390/nano12224046), 2022-11-17
Supplement: s1 [file s1]

# Omnidirectional Triboelectric Nanogenerator for Wide-Speed-Range Wind Energy Harvesting

Qiman Wang <sup>1</sup>, Wenhao Li <sup>2</sup>, Kun Wang <sup>2</sup>, Yitao Liao <sup>2</sup>, Junjie Zheng <sup>2</sup>, Xiongtu Zhou <sup>1,2,3</sup>, Jianpu Lin <sup>1,\*</sup>, Yongai Zhang <sup>1,2,3,\*</sup> and Chaoxing Wu <sup>1,2,3,\*</sup>

<sup>1</sup> College of Advanced Manufacturing, Fuzhou University, Quanzhou 362251, China

<sup>2</sup> College of Physics and Information Engineering, Fuzhou University, Fuzhou 350108, China

<sup>3</sup> Fujian Science and Technology Innovation Laboratory for Optoelectronic Information of China, Fuzhou 350108, China

\* Correspondence: ljp@fzu.edu.cn (J.L.); yongaizhang@fzu.edu.cn (Y.Z.); chaoxing\_wu@fzu.edu.cn (C.W.)

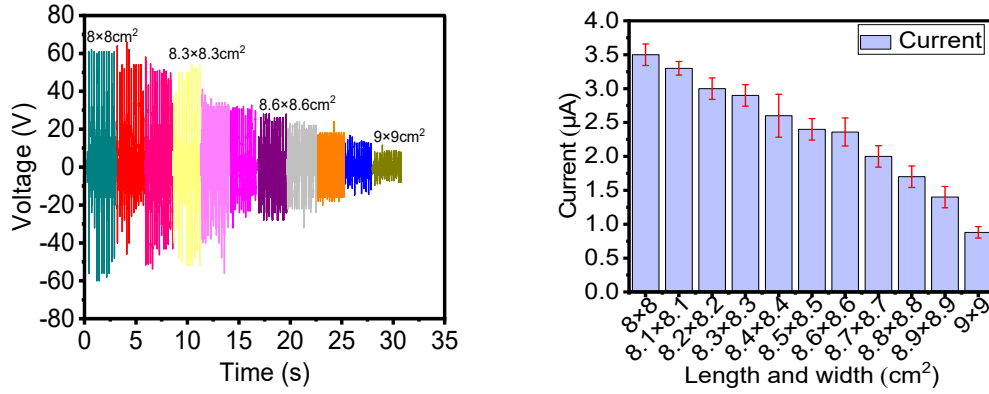

**Figure S1**  $V_{OC}$  and  $I_{SC}$  of the CS-TENG with different inner box areas.
